# Supplementary material
Source: Research Square preprint supplement (doi:10.21203/rs.3.rs-8974853/v1)

**Original blot images of Figure 6** (Show as : sh-NC, sh-FAM111B-2, sh-FAM111B-3)

CCNA2

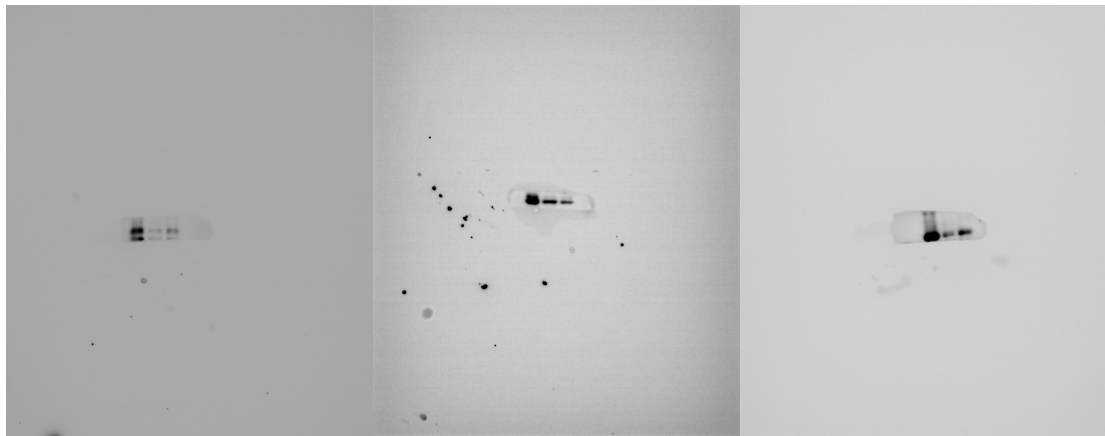

CCND1

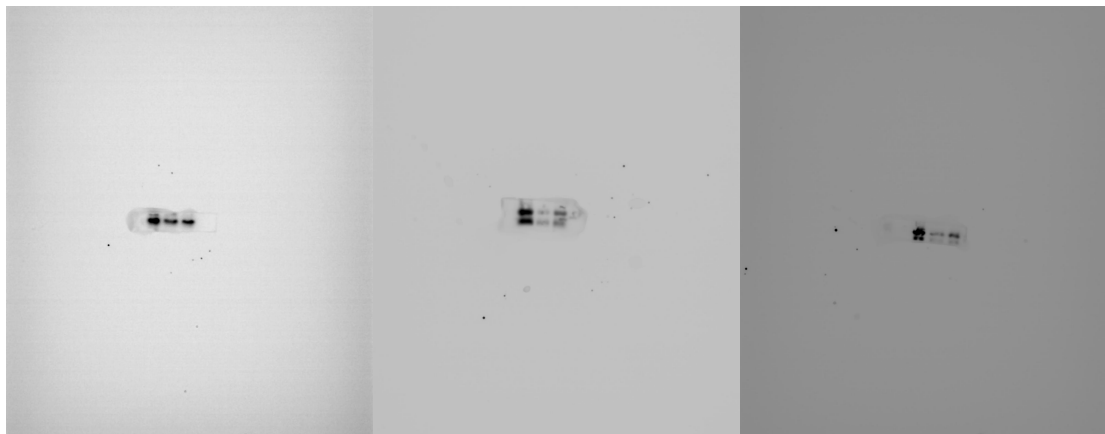

CCND2

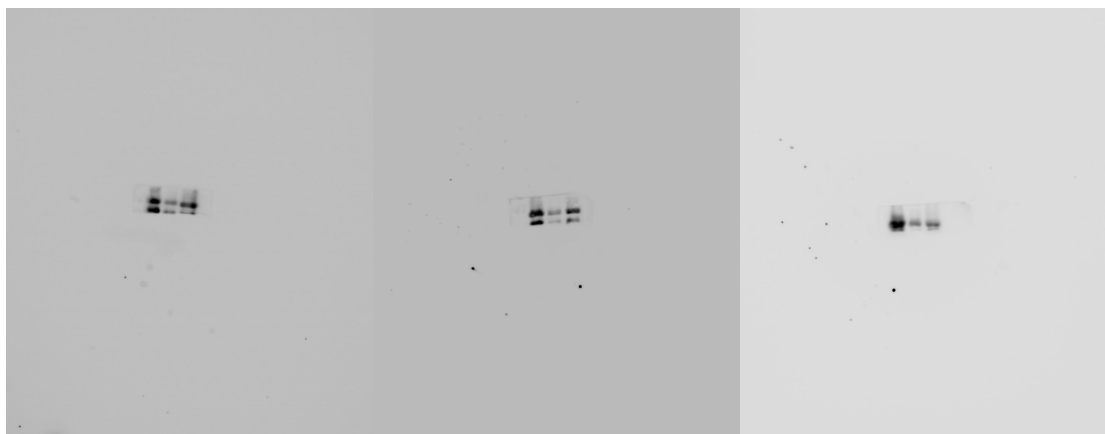

CDK2

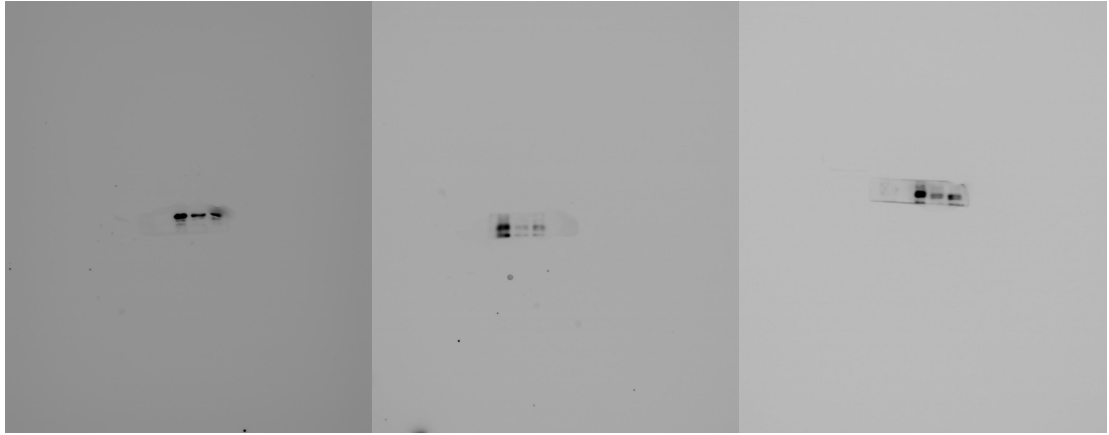

CDK4

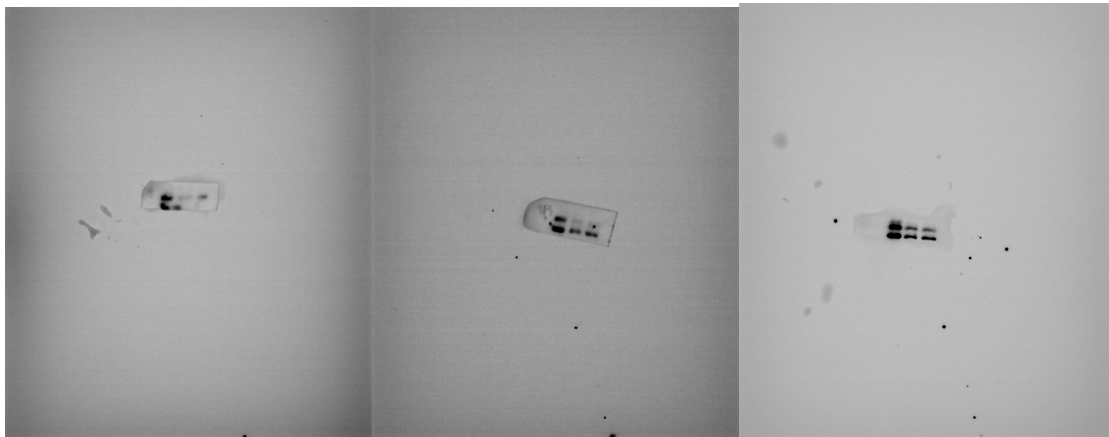

C-myc

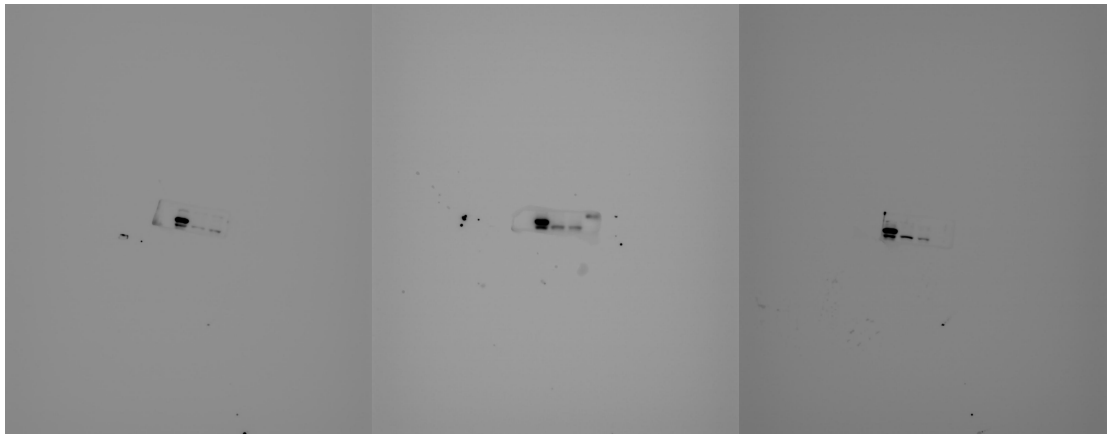

MDM2

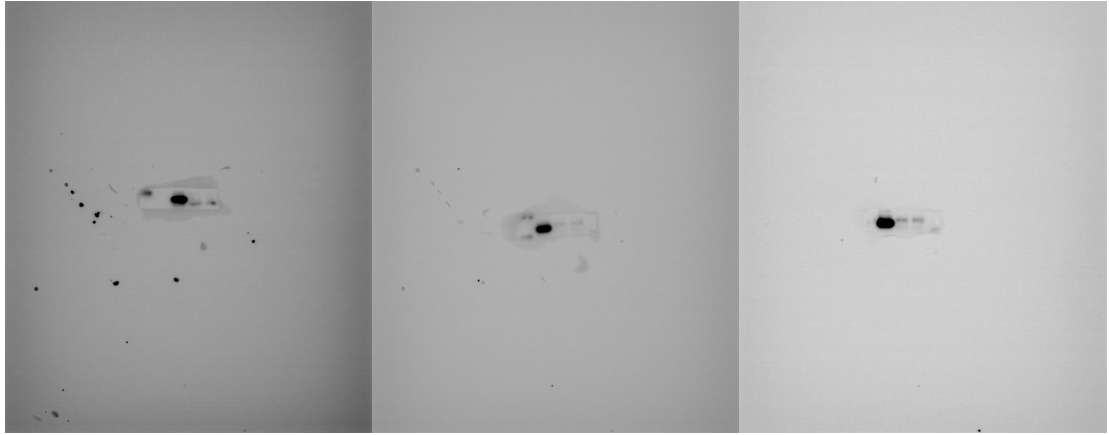

P-PI3K

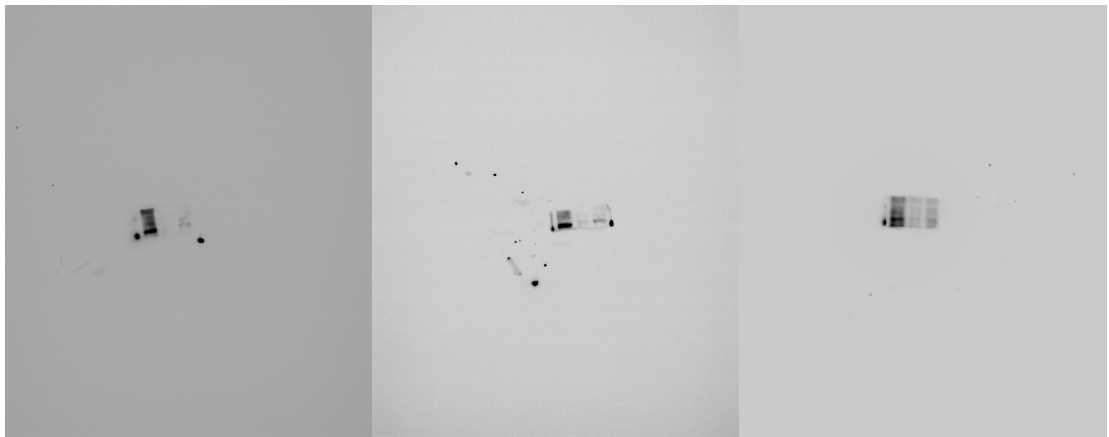

P21

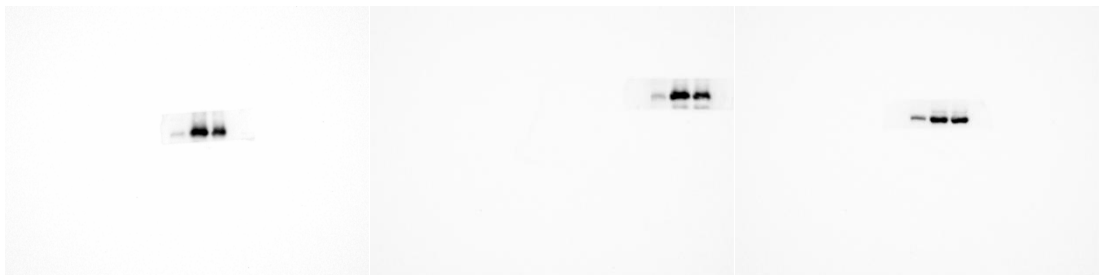

P27

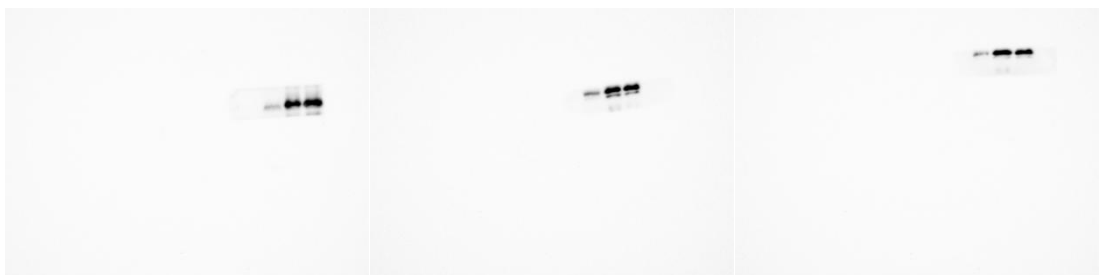

P53

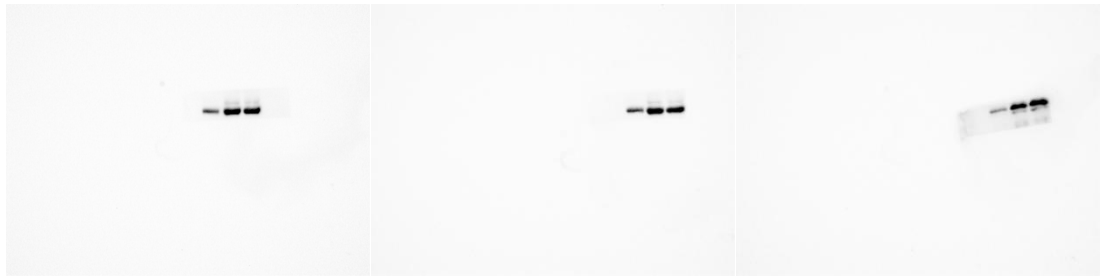

P-AKT(Ser473)

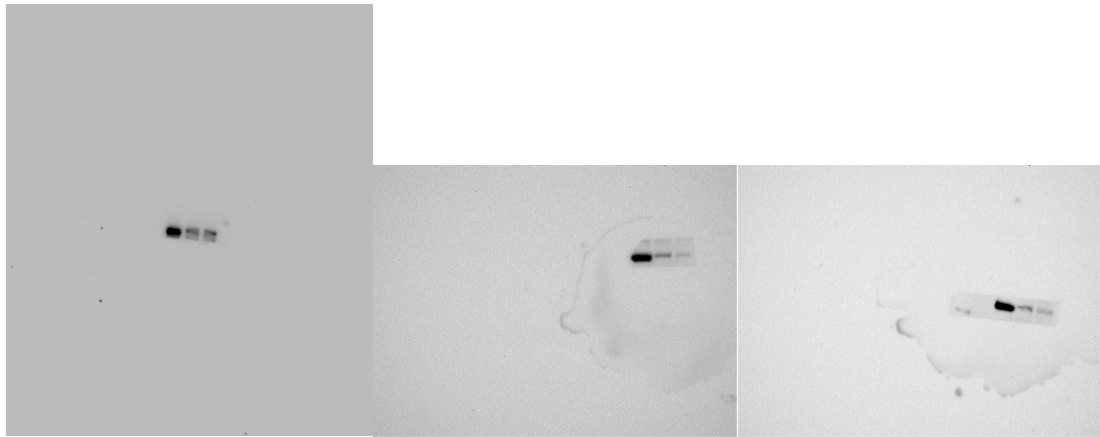

P-AKT(Thr308)

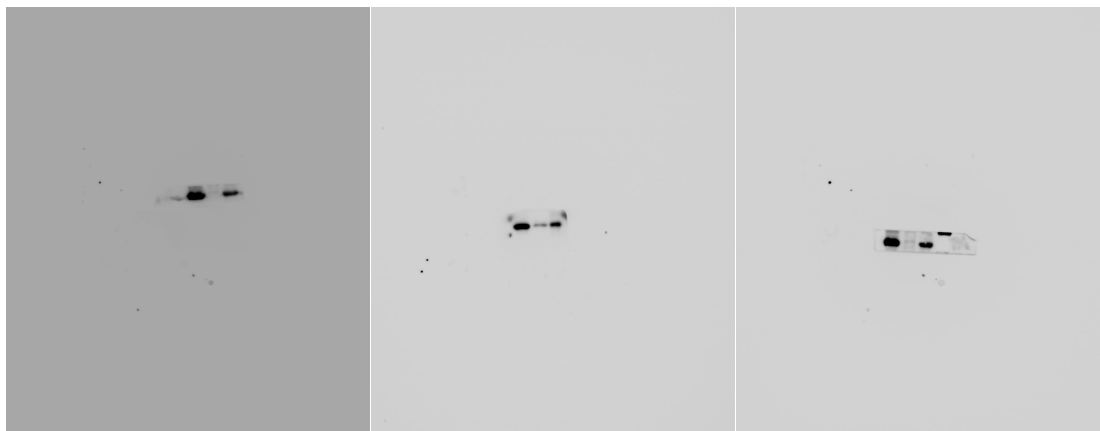

Total AKT

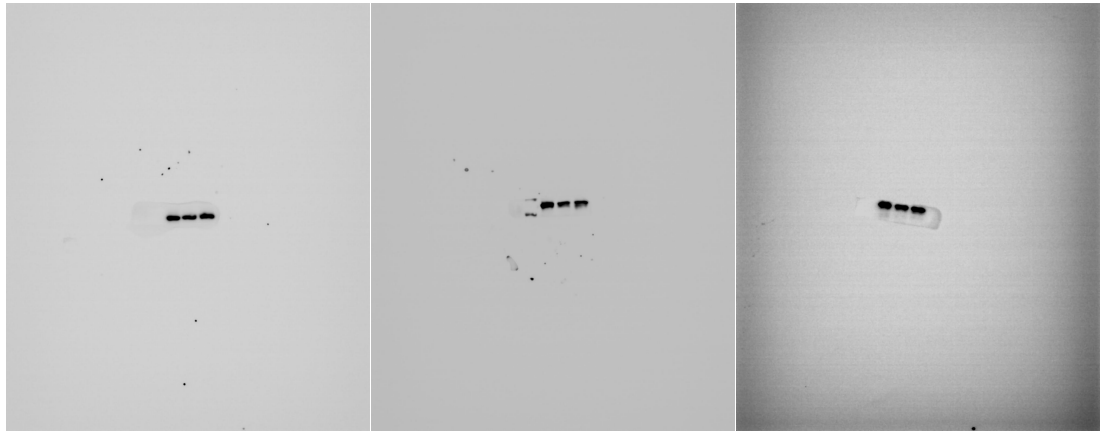

Total PI3K

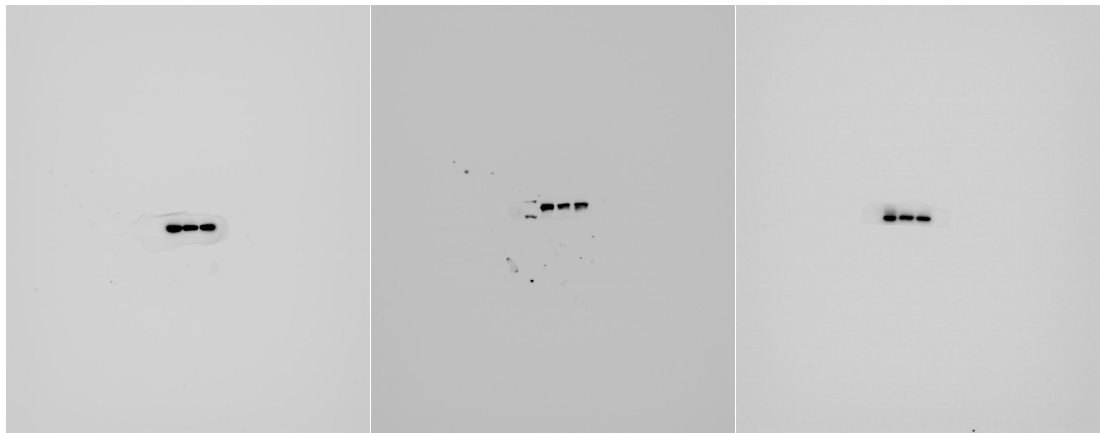

$\beta$ -ACTIN

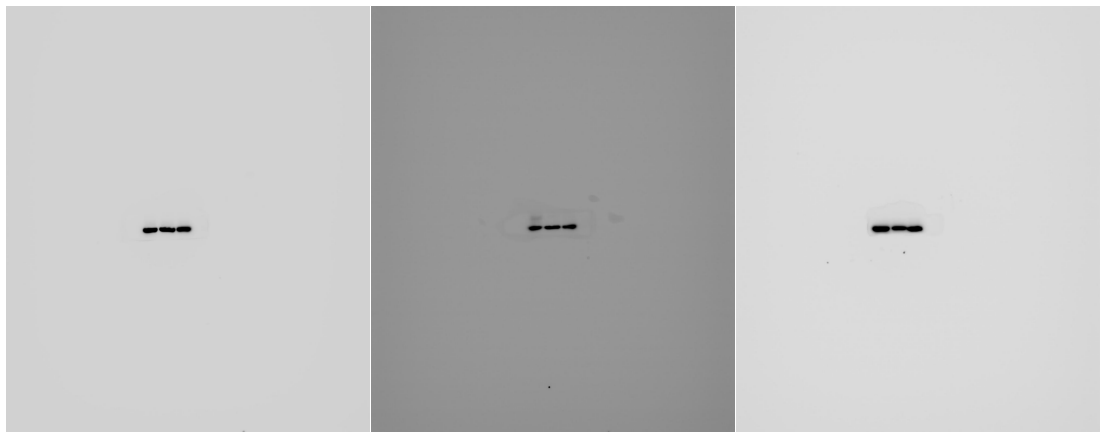

**Original blot images of Figure 7 (sh-NC, sh-FAM111B-2, sh-FAM111B-3)**

CCNA2

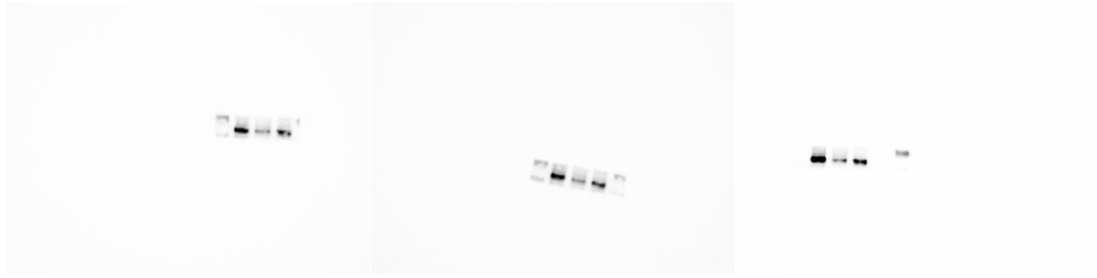

CCND1

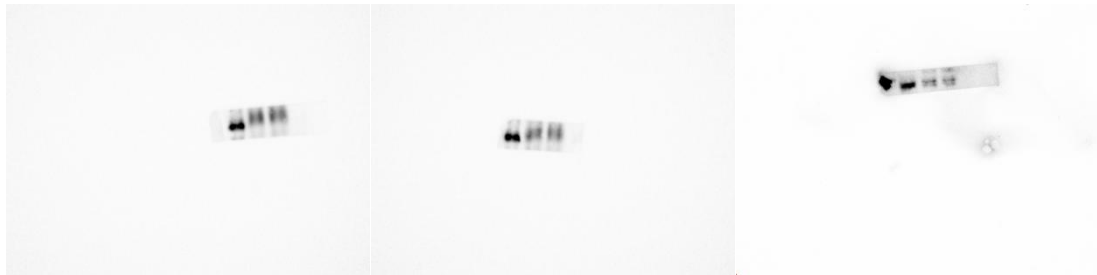

CCND2

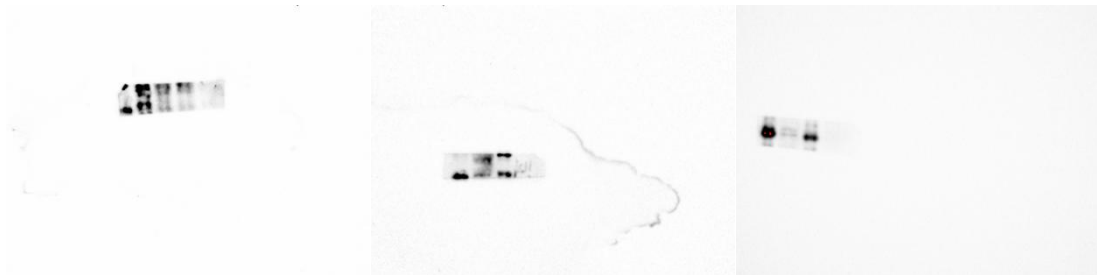

CDK2

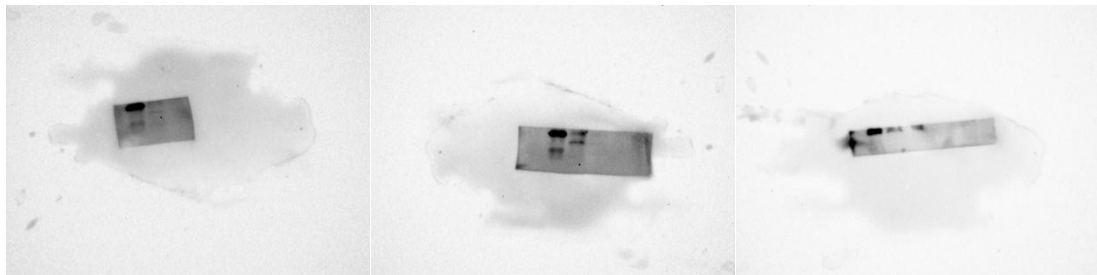

CDK4

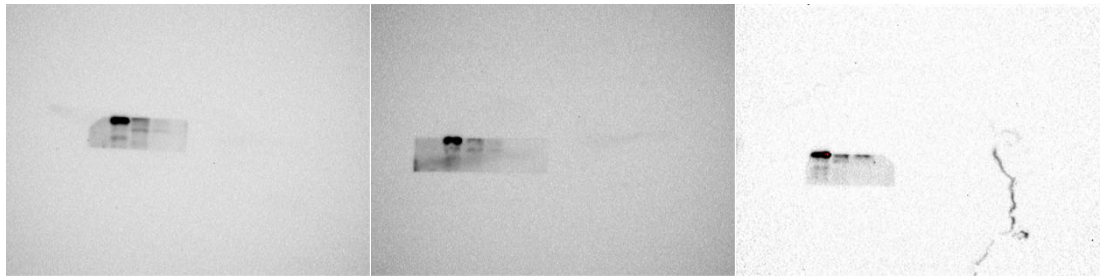

E-CATEIN

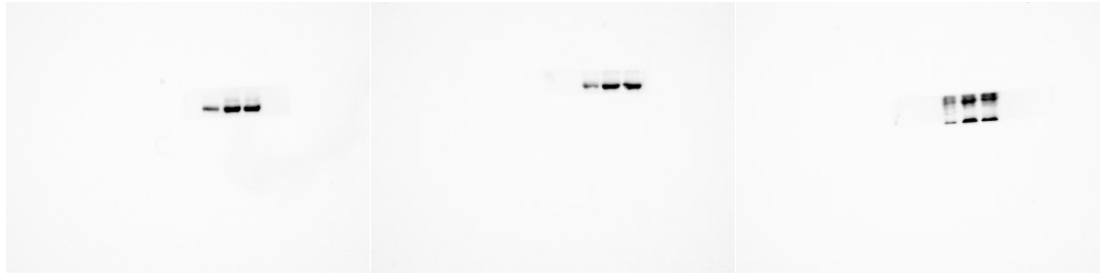

MDM2

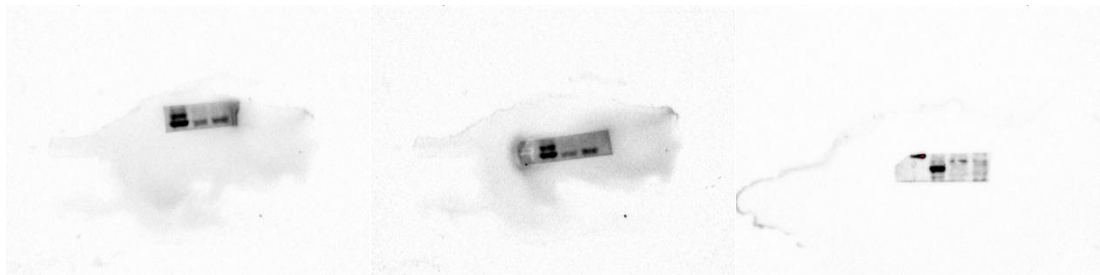

MMP2

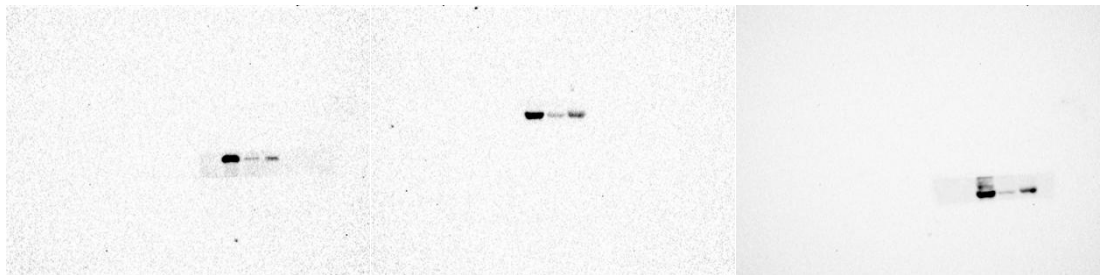

N-catenin

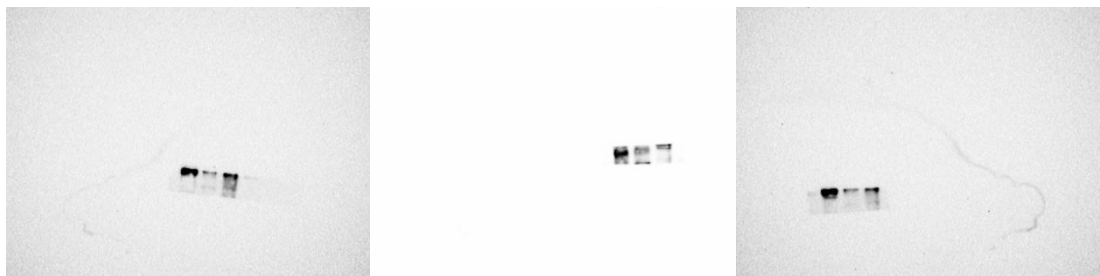

P-PI3K

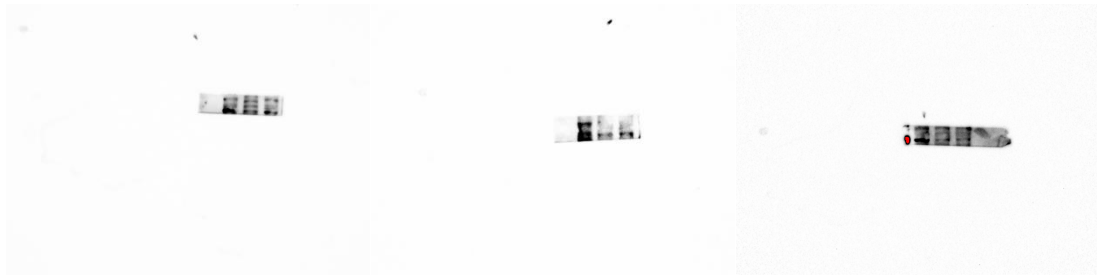

P21

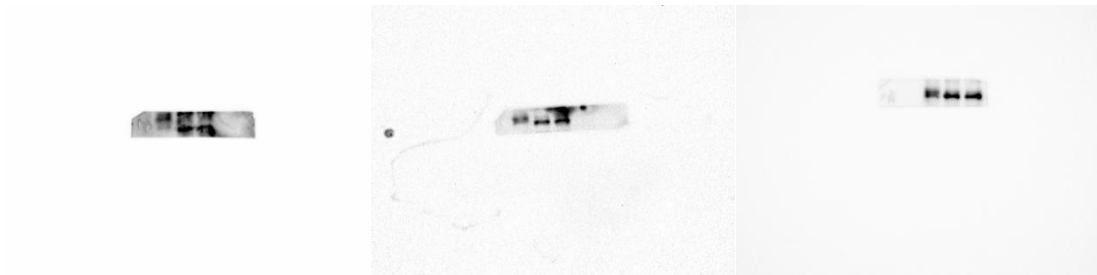

P27

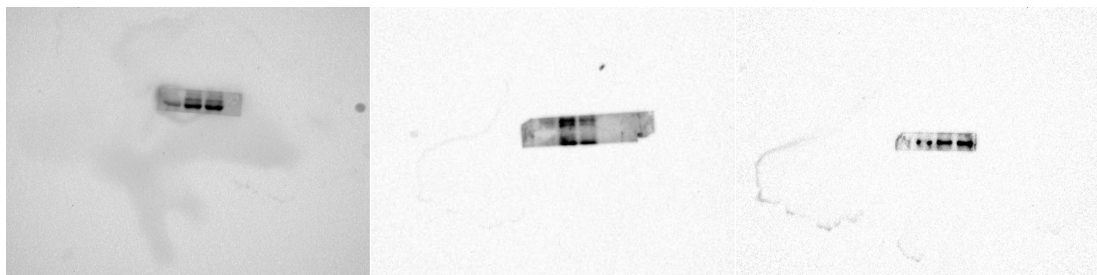

P53

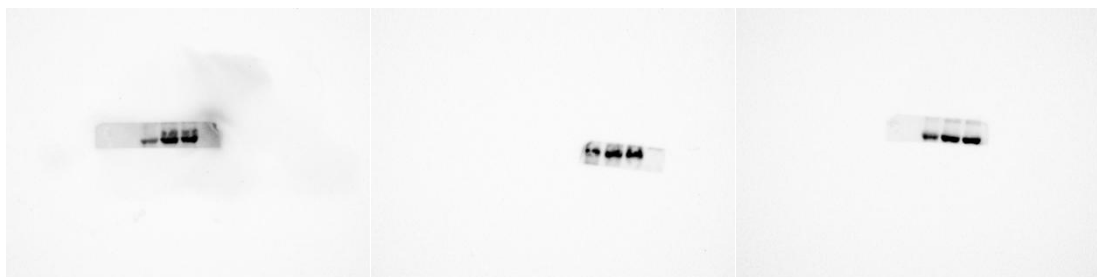

P-AKT(Ser473)

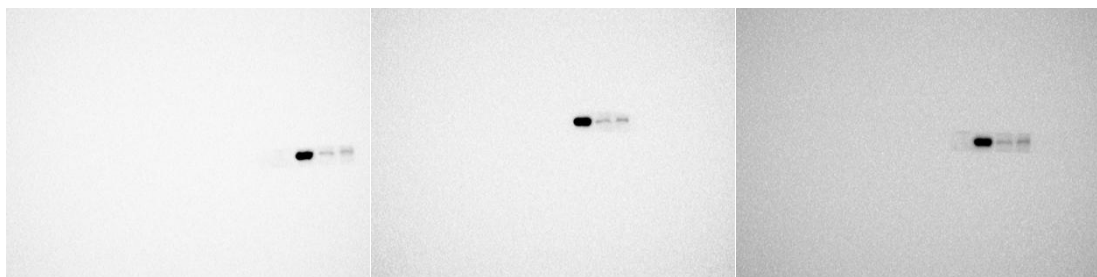

P-AKT(Thr308)

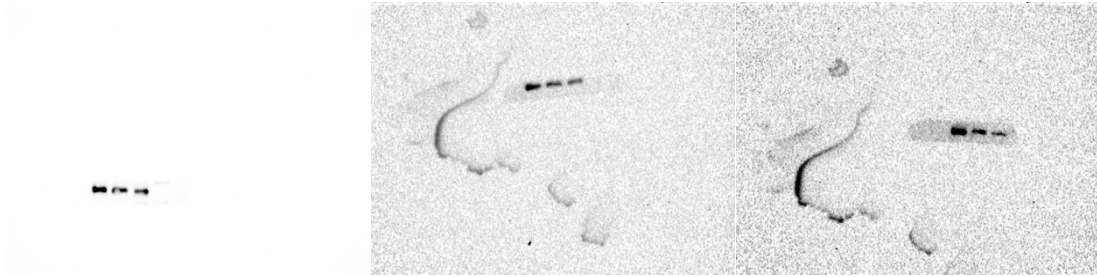

Total AKT

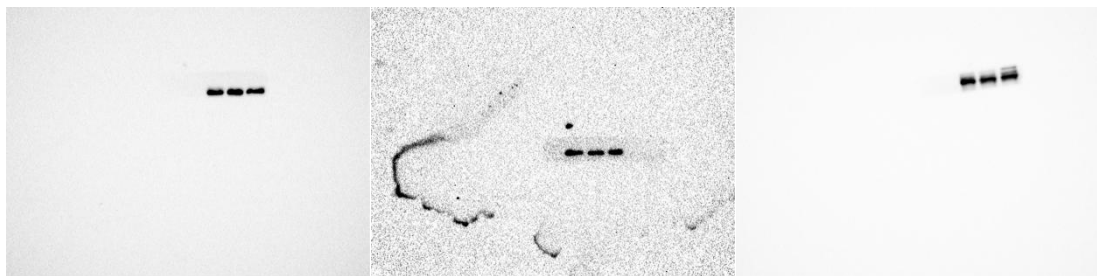

Total PI3K

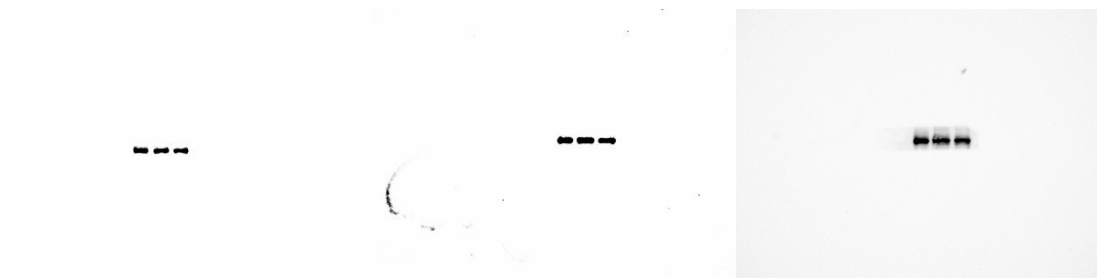

$\beta$ -actin

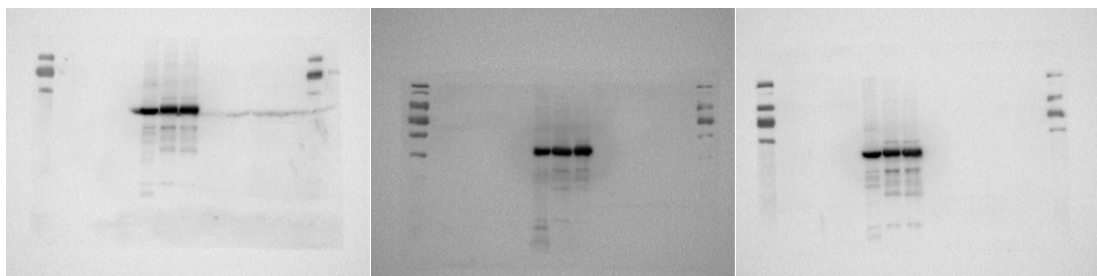

**Original blot images of Figure S1**

**Figure S1 A** (Show as : BEAS-2B, A549, NCI-H1299, NCI-H520, NCI-H226, SK-MES-1)  
FAM111B

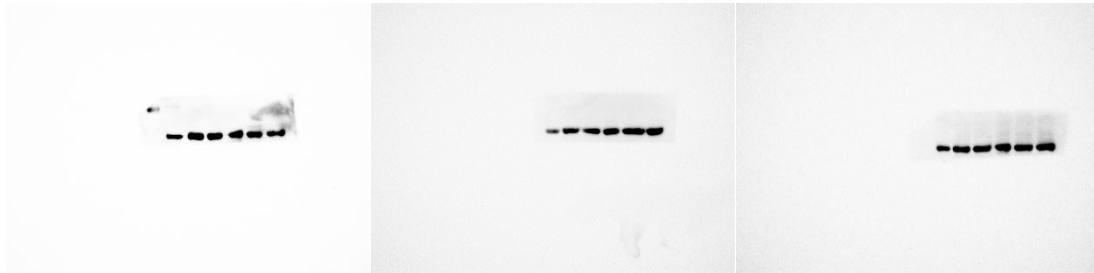

$\beta$ -ACTIN

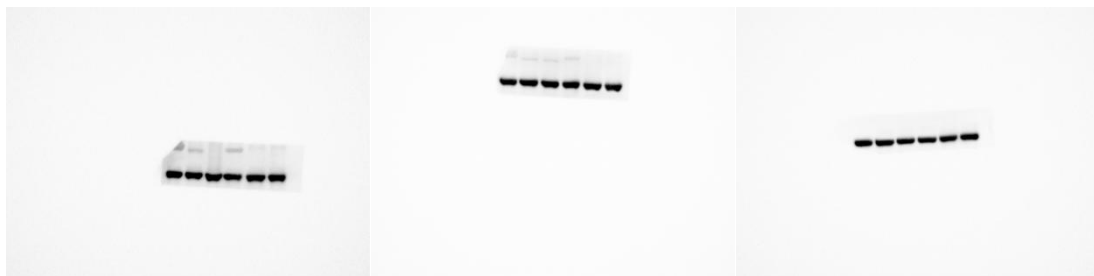

**Figure S1 C** (Show as : NCI-H226, sh-NC, sh-FAM111B-1, sh-FAM111B-2, sh-FAM111B-3 )  
FAM111B

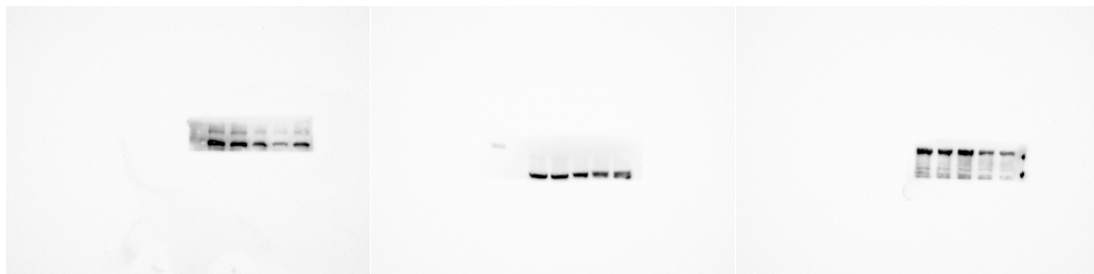

$\beta$ -ACTIN

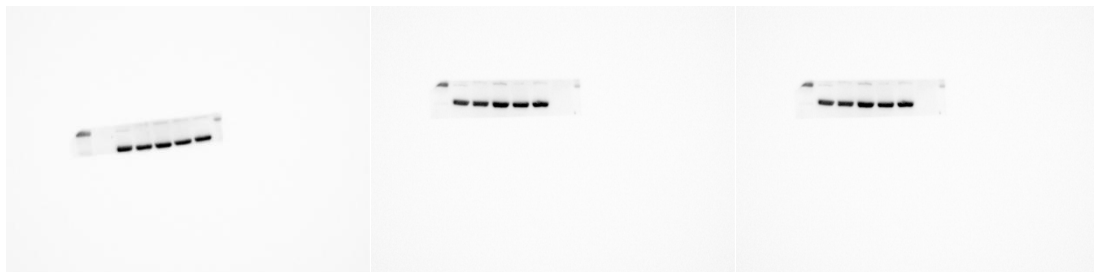

**Figure S1 E** (Show as : sh-NC, sh-FAM111B-1, sh-FAM111B-2, sh-FAM111B-3 )  
FAM111B

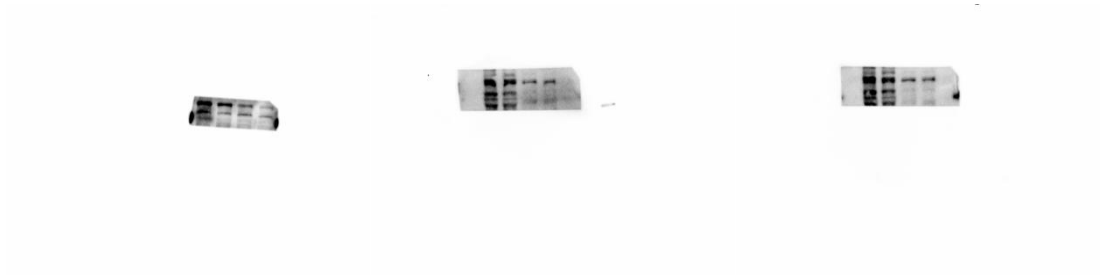

$\beta$ -ACTIN

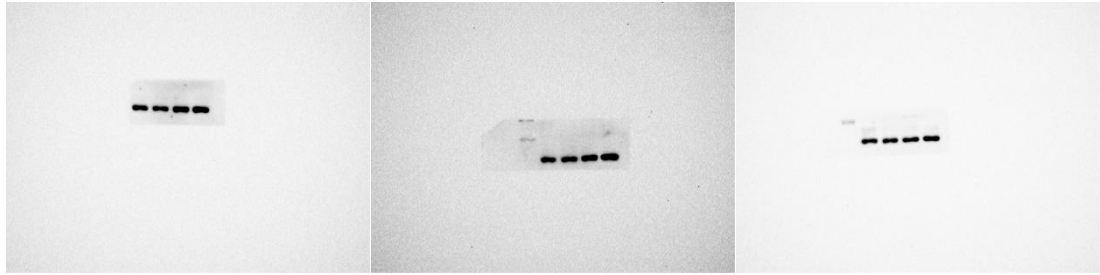

Supplement: Supplementary file 1 [file 704d25ecd72d6621ceb9511c.pdf]
